# Supplementary material
Source: PubMed Central journal article supplement (PMC5970058)
Supplement: NIHMS960113-supplement.pdf [file NIHMS960113-supplement.pdf]

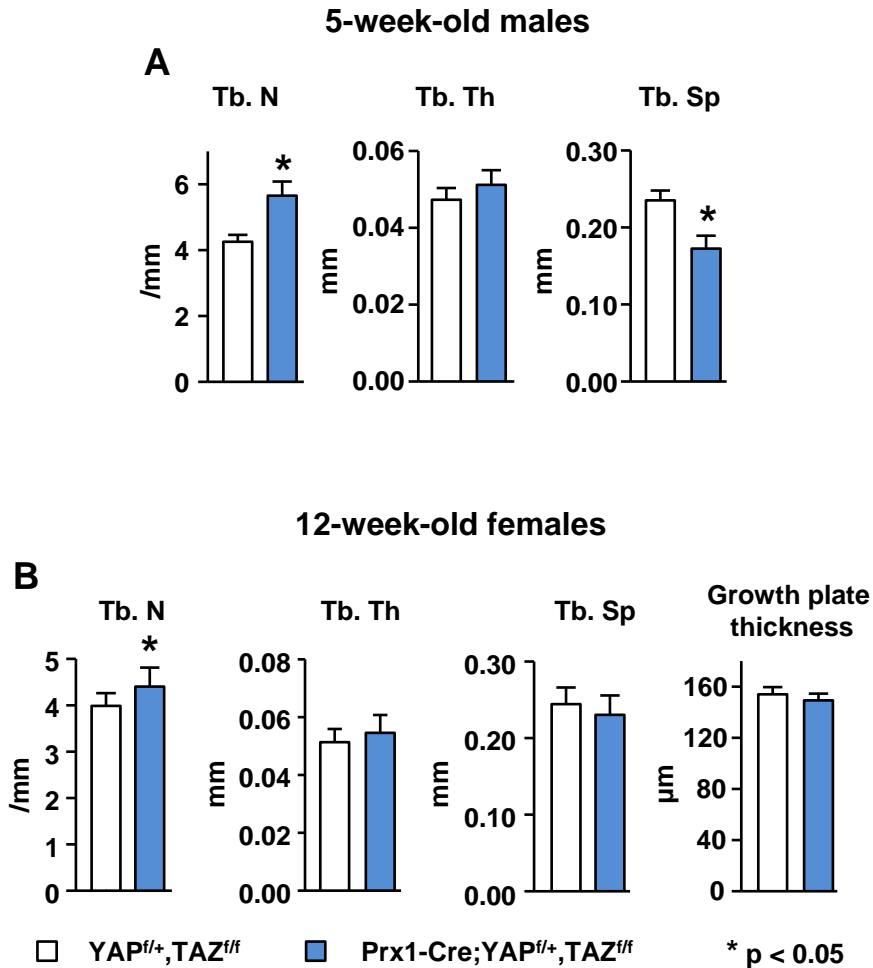

**Figure S1. Reduced YAP and TAZ in Prx1-Cre targeted cells increases bone mass.** (A) Trabecular number (Tb.N), trabecular thickness (Tb.Th), trabecular spacing (Tb.Sp.) in the femur of 5-week-old male Prx1-Cre;YAP<sup>f/+</sup>,TAZ<sup>f/f</sup> ( $n = 7$ ) mice and YAP<sup>f/+</sup>,TAZ<sup>f/f</sup> ( $n = 6$ ) littermates. (B) Trabecular number (Tb.N), trabecular thickness (Tb.Th), trabecular spacing (Tb.Sp.) of cancellous bone and growth plate thickness in the femur of 12-week-old female Prx1-Cre;YAP<sup>f/+</sup>,TAZ<sup>f/f</sup> ( $n = 10$ ) mice and YAP<sup>f/+</sup>,TAZ<sup>f/f</sup> ( $n = 11$ ) littermates. \* $P < 0.05$  versus YAP<sup>f/+</sup>,TAZ<sup>f/f</sup>, using Student's t-test.

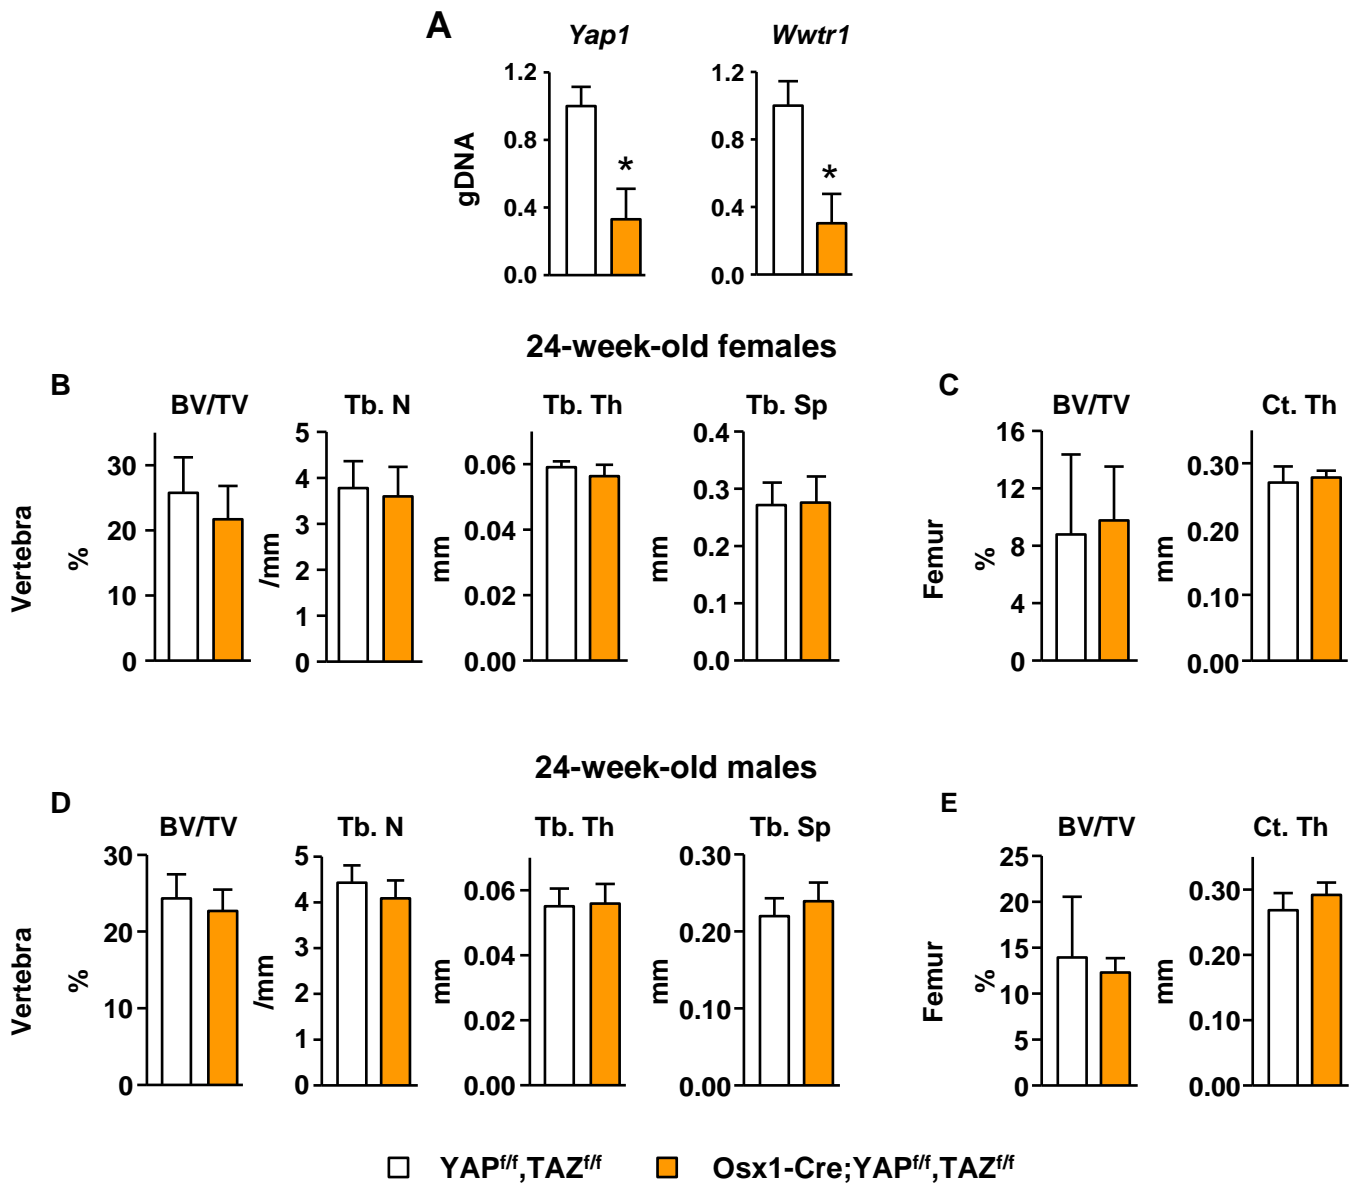

**Figure S2. Deletion of YAP and TAZ in *Osx1-Cre* targeted cells postnatally does not affect bone mass.** (A) Quantitative PCR of loxP-flanked genomic DNA isolated from tibial cortical bone of 24-week-old *Osx1-Cre;YAP<sup>ff</sup>,TAZ<sup>ff</sup>* ( $n = 9$ ) and *Osx1-Cre* ( $n = 9$ ) mice.  $*P < 0.05$  using Student's t-test. (B) Vertebral cancellous bone volume (BV/TV), trabecular number (Tb.N), trabecular thickness (Tb.Th), trabecular spacing (Tb.Sp.) in the L4 vertebra of 24-week-old female *Osx1-Cre* ( $n = 9$ ) and *Osx1-Cre;YAP<sup>ff</sup>,TAZ<sup>ff</sup>* ( $n = 9$ ) mice. (C) Cancellous bone volume (BV/TV) and cortical thickness (Ct.Th.) in the femur of 24-week-old female *Osx1-Cre* ( $n = 9$ ) and *Osx1-Cre;YAP<sup>ff</sup>,TAZ<sup>ff</sup>* ( $n = 9$ ) mice. (D) Cancellous bone volume (BV/TV), trabecular number (Tb.N), trabecular thickness (Tb.Th), trabecular spacing (Tb.Sp.) in the L4 vertebra of 24-week-old male *Osx1-Cre* ( $n = 10$ ) and *Osx1-Cre;YAP<sup>ff</sup>,TAZ<sup>ff</sup>* ( $n = 8$ ) mice. (E) Cancellous bone volume (BV/TV) and cortical thickness (Ct.Th.) in the femur of 24-week-old male *Osx1-Cre* ( $n = 10$ ) and *Osx1-Cre;YAP<sup>ff</sup>,TAZ<sup>ff</sup>* ( $n = 8$ ) mice. All mice were exposed to doxycycline in utero and maintained on a doxycycline-containing diet until 3 weeks of age.

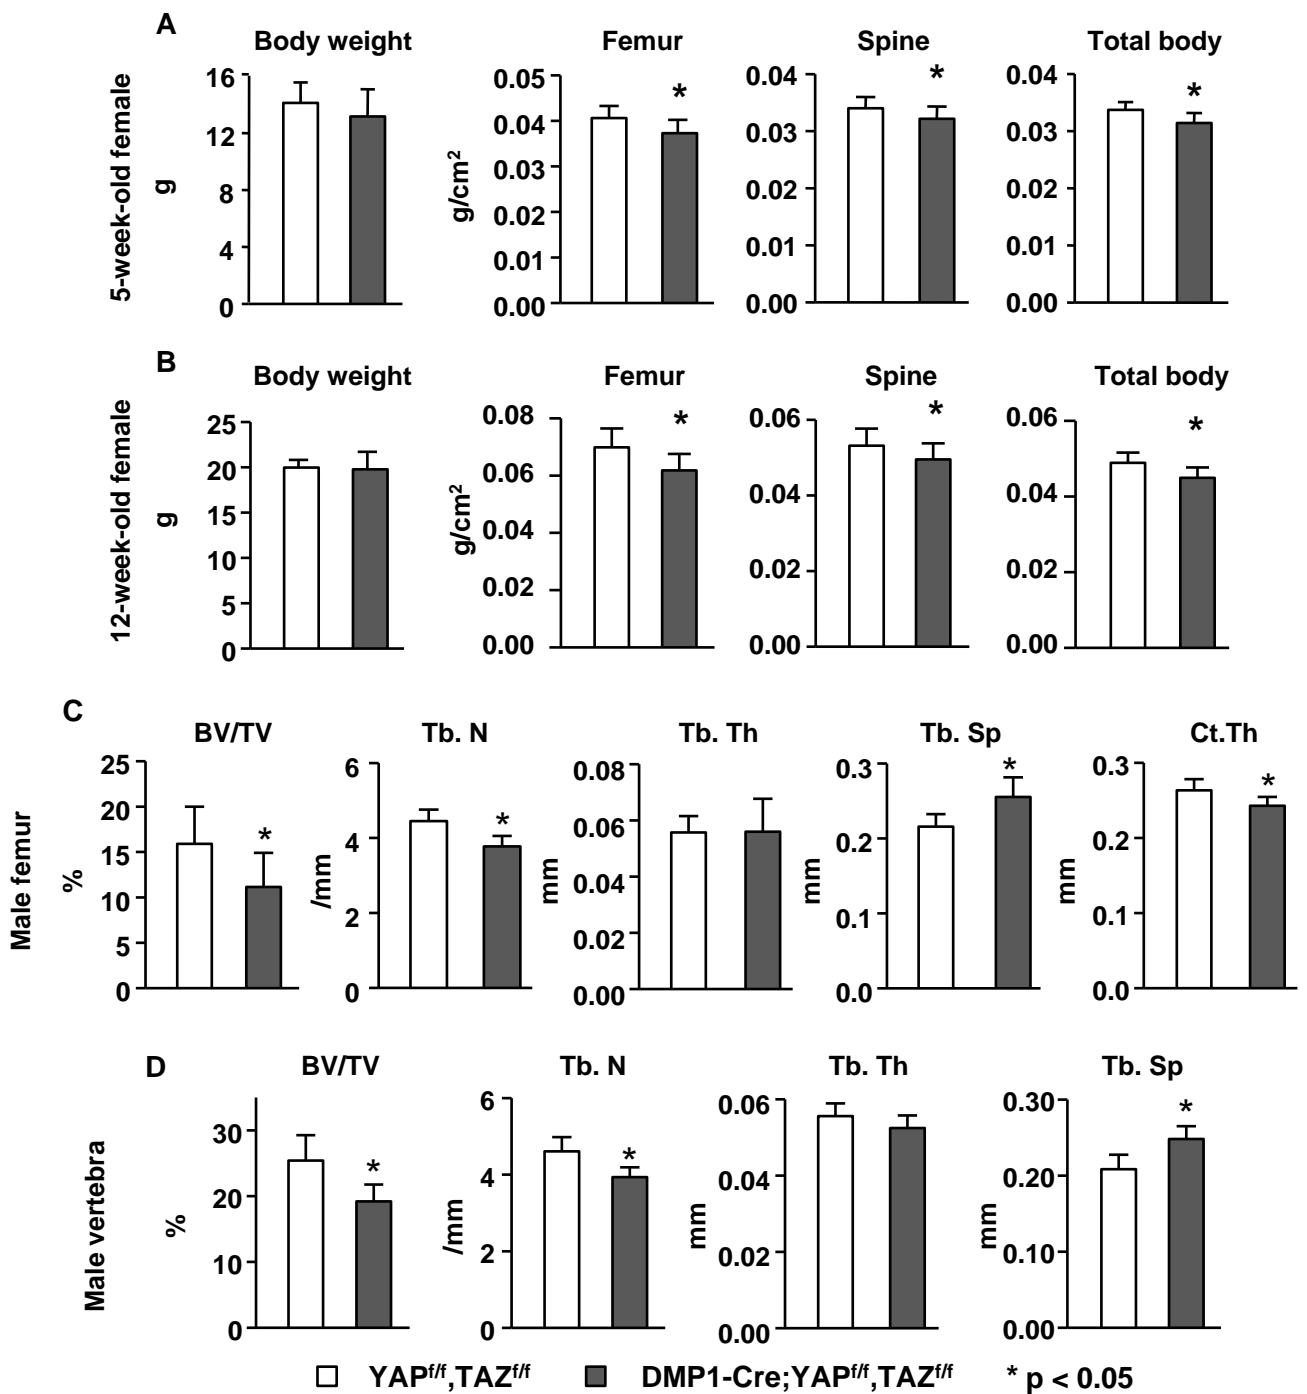

**Figure S3. Deletion of YAP and TAZ in Dmp1-Cre expressing cells causes low bone mass.** (A) Body weight and femoral, spinal, and total body bone mineral density (BMD) measured by DEXA of 5-week-old female YAP<sup>f/f</sup>,TAZ<sup>f/f</sup> ( $n = 10$ ) and Dmp1-Cre;YAP<sup>f/f</sup>,TAZ<sup>f/f</sup> ( $n = 11$ ) littermates. (B) Body weight and femoral, spinal, and total body bone mineral density (BMD) measured by DEXA of 12-week-old female YAP<sup>f/f</sup>,TAZ<sup>f/f</sup> ( $n = 10$ ) and Dmp1-Cre;YAP<sup>f/f</sup>,TAZ<sup>f/f</sup> ( $n = 11$ ) littermates. (C) Femoral cancellous bone volume (BV/TV), trabecular number (Tb.N), trabecular thickness (Tb.Th), trabecular spacing (Tb.Sp.) and cortical thickness (Ct.Th.) measured in the femur of 3-month-old male YAP<sup>f/f</sup>,TAZ<sup>f/f</sup> ( $n = 9$ ) and Dmp1-Cre;YAP<sup>f/f</sup>,TAZ<sup>f/f</sup> ( $n = 9$ ) mice. (D) Vertebral cancellous bone volume (BV/TV), trabecular number (Tb.N), trabecular thickness (Tb.Th), and trabecular spacing (Tb.Sp.) of 12-week-old male YAP<sup>f/f</sup>,TAZ<sup>f/f</sup> ( $n = 9$ ) and Dmp1-Cre;YAP<sup>f/f</sup>,TAZ<sup>f/f</sup> ( $n = 9$ ) mice. \* $P < 0.05$  using Student's t-test.
